# Supplementary material
Source: PubMed Central journal article supplement (PMC4458395)
Supplement: NIHMS684449-supplement-1.pdf [file NIHMS684449-supplement-1.pdf]

Fig. S1

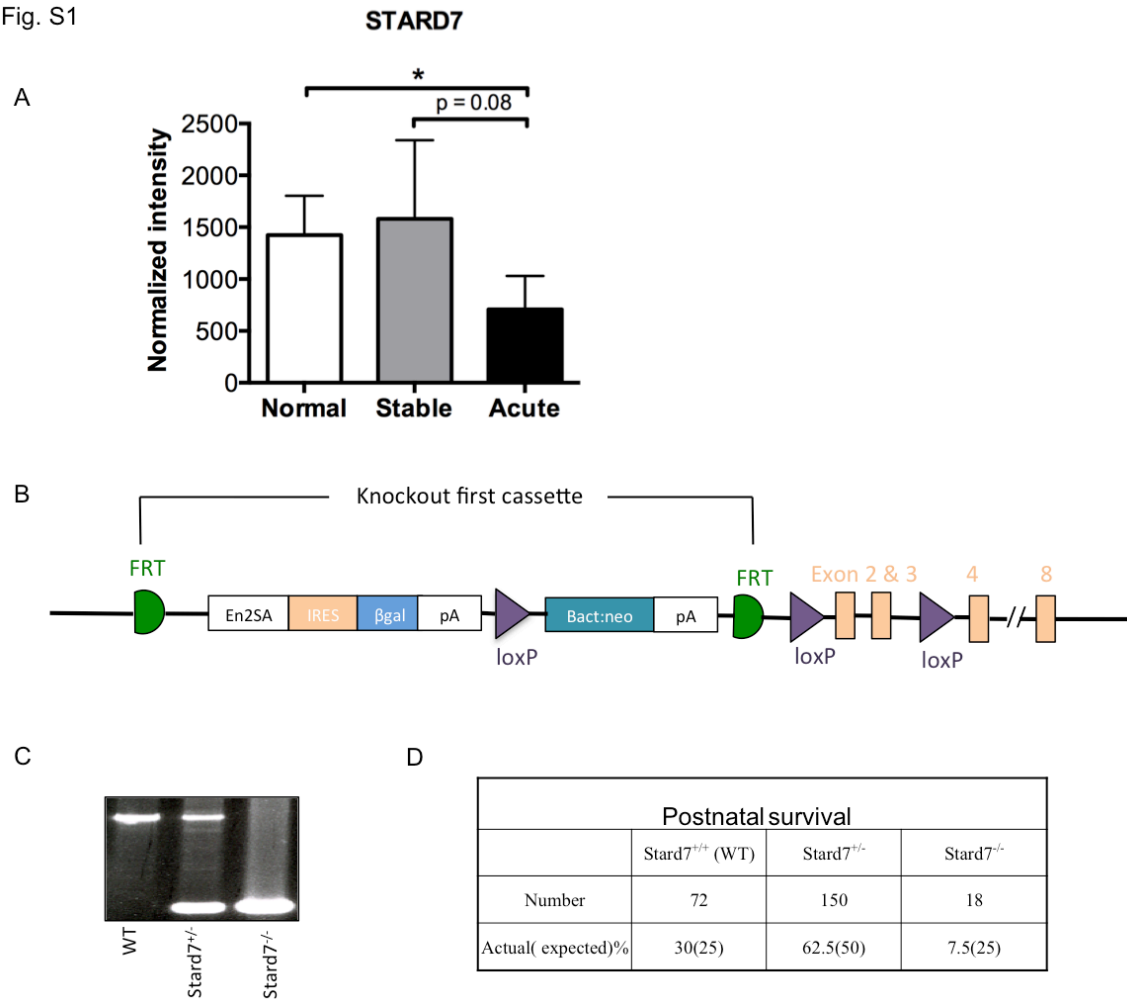

**Fig. S1. Generation of *Stard7*<sup>+/-</sup> mice.**

(A) Expression of *Stard7* mRNA in nasal epithelial cells isolated from children with stable asthma or an acute asthma exacerbation (kindly provided by G.K. Hershey, M.D., Ph.D., Cincinnati Children's Hospital Medical Center; Guajardo, J. R., K. W. Schleifer, M. O. Daines, R. M. Ruddy, B. J. Aronow, M. Wills-Karp, and G. K. Hershey. 2005. Altered gene expression profiles in nasal respiratory epithelium reflect stable versus acute childhood asthma. *The Journal of allergy and clinical immunology* 115: 243-251). (B) Schematic of the targeted *Stard7* allele. A trapping cassette (SA-beta-gal-pA) flanked by FRT sites was targeted to intron 1 of the *Stard7* gene; exons 2 and 3 of *Stard7* are flanked

by LoxP sites for cell/tissue-specific deletion of *Stard7*. FRT, FLP-recombinase target site-directed recombination; En2SA, entrained 2 splice acceptor site; IRES, internal ribosome entry site;  $\beta$ -act:neo,  $\beta$ -actin promoter driving neomycin gene selectable marker; pA, polyadenylation site. (C) PCR analysis of the targeted *Stard7* allele in tail DNA of 8 week-old mice. (D) Table depicting survival of 3 week-old progeny from *Stard7*<sup>+/-</sup> intercrosses.

Fig S2

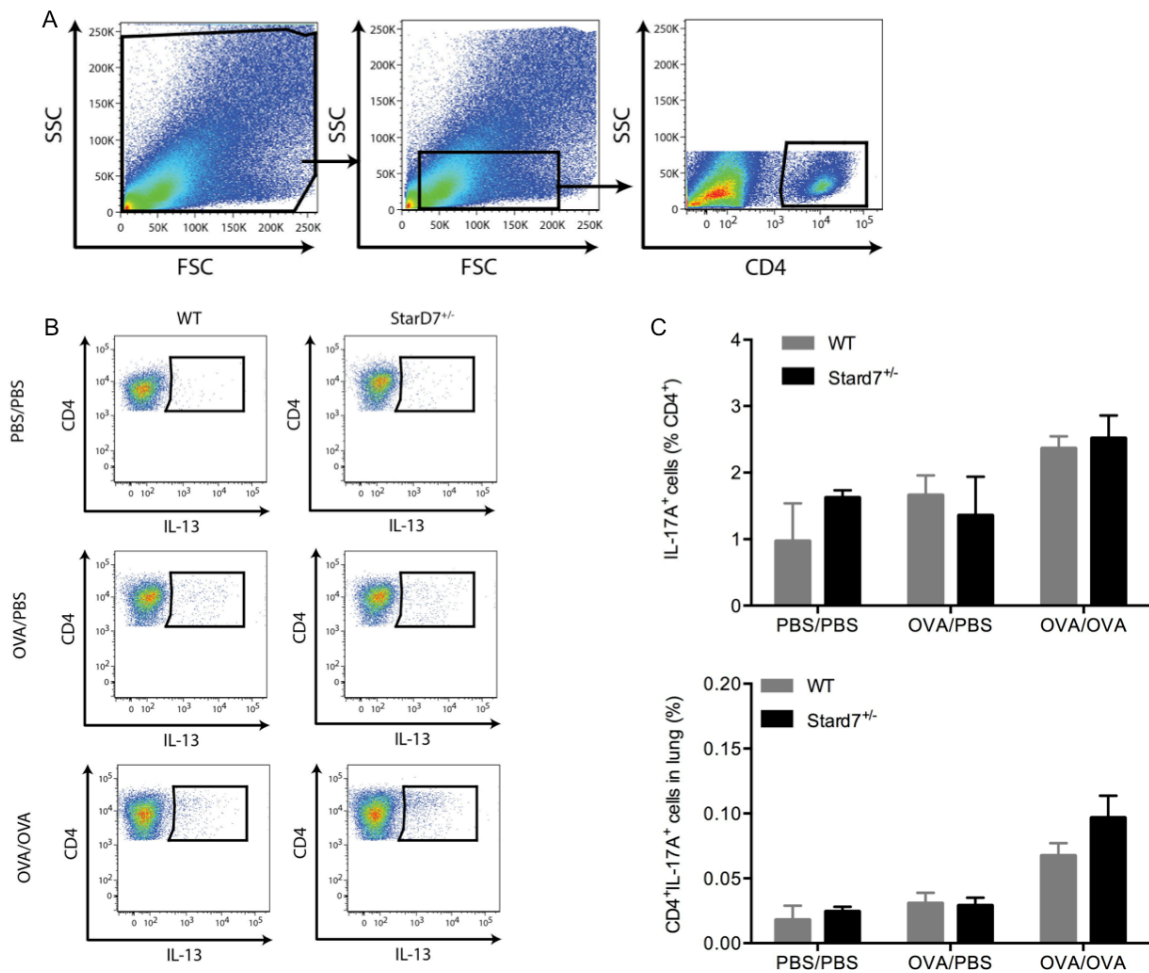

**Fig. S2. Identification of IL-13-secreting T cells in the lungs of OVA-exposed WT and *Stard7*<sup>+/-</sup> mice.**

Lung cells were isolated from PBS-sensitized, PBS-challenged (PBS/PBS), OVA-sensitized, PBS challenged (OVA/PBS), or OVA-sensitized, OVA-challenged (OVA/OVA) WT or *Stard7*<sup>+/-</sup> mice. Cells were stimulated overnight with PMA/Ionomycin, and cultured in the presence of brefeldin A and monensin for 4 hours. Cells were stained with mAbs to CD4 and IL-13 or IL-17A for analysis of the frequency of cytokine positive CD4 cells. (A) Gating strategy used to identify CD4<sup>+</sup> cells. (B) Representative dot plots showing identification of IL-13<sup>+</sup> CD4<sup>+</sup> T cells from WT and *Stard7*<sup>+/-</sup> mice in the various treatment groups. This gating strategy was used to identify cytokine producing CD4<sup>+</sup> T cells enumerated in Figures 3 and S2C. *n* = 4-8 mice/group.

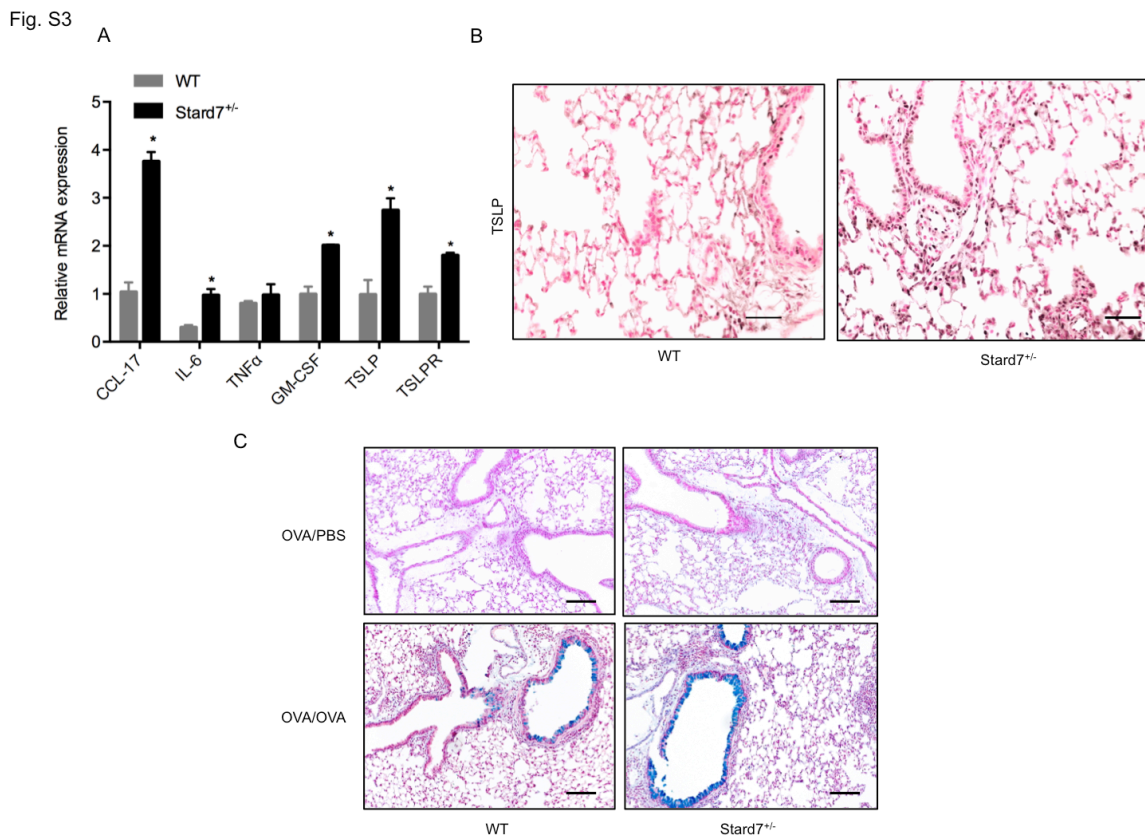

**Fig. S3. Deficiency of *Stard7* is associated with increased inflammatory mediators and mucous cell metaplasia following OVA sensitization and challenge.**

(A) qRT-PCR of cytokine and chemokine mRNAs from lung tissue of sensitized and challenged mice. TSLP, thymic stromal lymphopoietin; TSLPR, thymic stromal lymphopoietin receptor.  $n = 4$  mice/group. (B) Immunohistochemical staining of TSLP in lung tissue from OVA-sensitized and challenged mice. Scale bars = 50  $\mu\text{m}$ . (C) Alcian blue staining of lung tissue following sensitization and challenge with OVA/PBS or OVA/OVA.  $n = 4$  mice/group. Scale bars = 50  $\mu\text{m}$ .

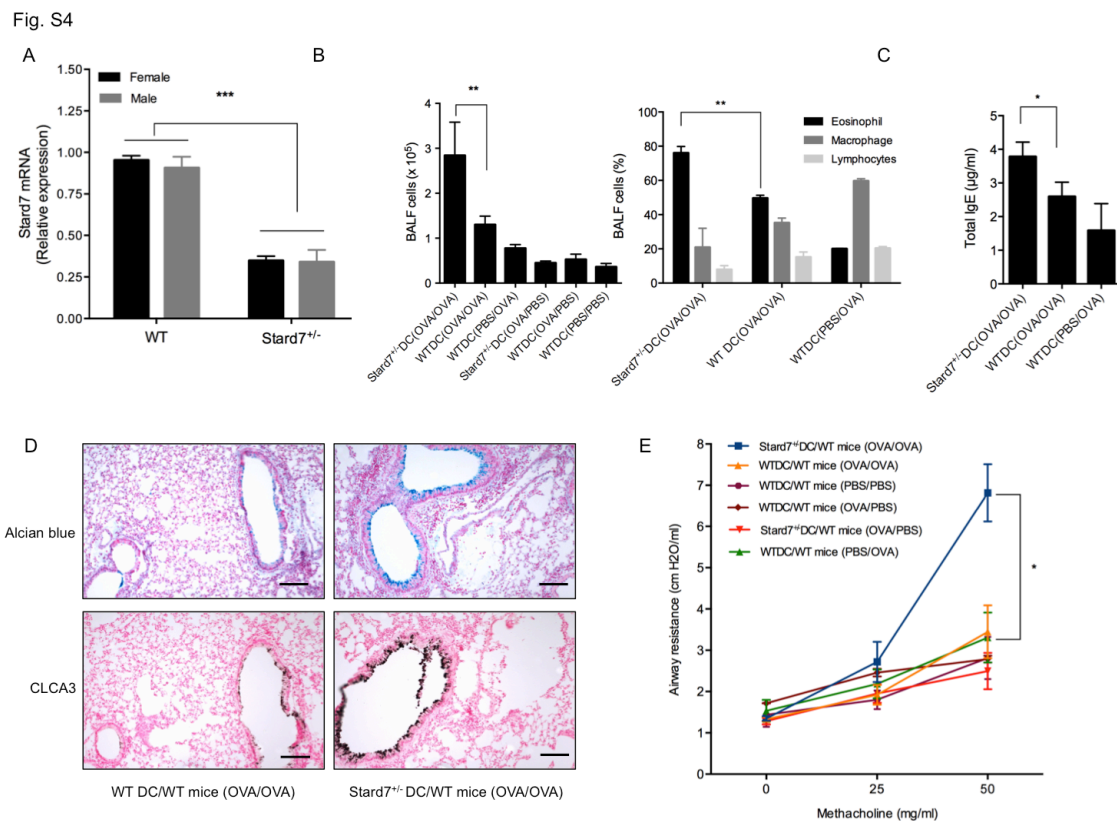

**Fig. S4. Adoptive transfer of *Stard7*<sup>+/-</sup> BMDCs confers an exaggerated allergic response in WT mice.**

OVA-pulsed BMDCs from WT or *Stard7*<sup>+/-</sup> mice were injected into the airways of WT mice followed by intratracheal OVA challenge (days 10-13) and analysis on day 14. (A) qRT-PCR of *Stard7* mRNA in BMDCs (6 days after GM-CSF differentiation) from 8

week-old donor mice.  $\beta$ -actin was used as an endogenous control.  $n = 3$  samples/group. (B) Total (left panel) and differential (right panel) BALF cell counts in BMDC recipient mice challenged with OVA.  $n = 8$  mice/group. (C) Total IgE in WT recipient mice challenged with OVA.  $n = 5$  mice/group. (D) Alcian blue (upper panels) and CLCA3 immunohistochemistry (lower panels) in lung tissue of WT recipient mice challenged with OVA. Scale bars = 50  $\mu$ m. (E) AHR was evaluated in BMDC recipient mice challenged with PBS or OVA.  $n = 8$  mice/group; \* $p$  value, *Stard7*<sup>+/-</sup> DC/WT mice (OVA/OVA) vs. WT DC/WT mice (OVA/OVA).
